# Supplementary material
Source: publisher site journal article supplement (http://kjim.org/upload/media/kjim-2020-222-suppl2.pdf)
Supplement: Supplementary file 1 [file kjim-2020-222-suppl2.pdf]

**Supplementary Table 1. The comparison in opinions on preparation for future COVID-19 outbreak according to experience in treating COVID-19 patients as an attending physician**

| Variable                                                                                                             | Existence, %<br>(n = 90) | Absence, %<br>(n = 42) | 95% CI of<br>Agresti-caffo |
|----------------------------------------------------------------------------------------------------------------------|--------------------------|------------------------|----------------------------|
| <b>Important items that will be needed in hospitals in preparation for a second wave of COVID-19<sup>a</sup></b>     |                          |                        |                            |
| N95 respirators                                                                                                      | 68.9                     | 73.8                   | -0.12 to 0.21              |
| Isolation units (including negative-pressure units)                                                                  | 40.0                     | 47.6                   | -0.10 to 0.25              |
| Hooded coveralls                                                                                                     | 38.9                     | 47.6                   | -0.09 to 0.26              |
| PAPR equipment (including hoods)                                                                                     | 44.4                     | 7.1                    | 0.19 to 0.52               |
| Professional physician for COVID-19                                                                                  | 30.0                     | 14.3                   | -0.01 to 0.30              |
| Professional nursing personnel for COVID-19                                                                          | 26.7                     | 21.4                   | -0.11 to 0.20              |
| Infection control personnel                                                                                          | 13.3                     | 19.0                   | -0.07 to 0.20              |
| Other protective gear (goggles, hair caps, etc.)                                                                     | 13.3                     | 16.7                   | -0.09 to 0.17              |
| Equipment for oxygen supplementation (including ventilators, high-flow O <sub>2</sub> )                              | 8.9                      | 23.8                   | 0.02 to 0.28               |
| Drugs for treatment (e.g., chloroquine, remdesivir, etc.)                                                            | 11.1                     | 16.7                   | -0.06 to 0.19              |
| Diagnostic equipment                                                                                                 | 4.4                      | 7.1                    | -0.05 to 0.13              |
| Hand sanitizer                                                                                                       | 0                        | 4.8                    | 0 to 0.12                  |
| <b>Key areas of research and development to foster in preparation for the further spread of COVID-19<sup>a</sup></b> |                          |                        |                            |
| Development of an effective vaccine                                                                                  | 72.2                     | 81.0                   | -0.08 to 0.24              |
| Development of an effective drug for treatment                                                                       | 55.6                     | 59.5                   | -0.14 to 0.21              |
| Development of rapid and accurate diagnostic testing methods                                                         | 48.9                     | 59.5                   | -0.08 to 0.28              |
| Development of an effective epidemiological investigation system                                                     | 33.3                     | 31.0                   | -0.15 to 0.19              |
| Establishing a clinical trial system that can verify reported therapeutic agents or new drugs                        | 32.2                     | 21.4                   | -0.06 to 0.26              |
| Development of mass supply methods for convalescent plasma from cured patients                                       | 14.4                     | 21.4                   | -0.06 to 0.21              |
| Development of an effective self-isolation monitoring tool                                                           | 15.6                     | 7.1                    | -0.05 to 0.20              |
| Establishing a system for virus segregation                                                                          | 12.2                     | 7.1                    | -0.08 to 0.16              |
| Development of an effective protective gear                                                                          | 11.1                     | 7.1                    | -0.08 to 0.14              |
| Establishing animal experimental models that can verify reported therapeutic agents or new drugs                     | 4.4                      | 4.8                    | -0.07 to 0.10              |
| <b>Important policies to be implemented at the national level in preparation for another outbreak<sup>a</sup></b>    |                          |                        |                            |
| Securing national hospitals designated for the treatment of infectious diseases                                      | 68.9                     | 64.3                   | -0.12 to 0.22              |
| Strengthening immigration or prohibiting entry from countries in the outbreak                                        | 66.7                     | 64.3                   | -0.14 to 0.20              |
| Maintaining social distancing                                                                                        | 40.0                     | 59.5                   | 0.01 to 0.37               |
| Establishing a system for participation of private medical institutions/personnel in outbreaks                       | 47.8                     | 40.5                   | -0.11 to 0.25              |
| Reorganization of healthcare-related government                                                                      | 26.7                     | 14.3                   | -0.04 to 0.27              |
| Securing masks, hand sanitizers                                                                                      | 23.3                     | 19.0                   | -0.12 to 0.19              |
| Securing community treatment centers                                                                                 | 18.9                     | 19.0                   | -0.13 to 0.15              |
| Activation of online education/conference systems                                                                    | 4.4                      | 16.7                   | 0.02 to 0.23               |
| Full-fledge introduction of telemedicine                                                                             | 3.3                      | 2.4                    | -0.07 to 0.08              |

**Supplementary Table 1. Continued**

| Variable                                                                                                        | Existence, %<br>(n = 90) | Absence, %<br>(n = 42) | 95% CI of<br>Agresti-caffo |
|-----------------------------------------------------------------------------------------------------------------|--------------------------|------------------------|----------------------------|
| <b>Individuals without symptoms to be screened using RT-PCR tests to prevent hospital outbreaks<sup>b</sup></b> |                          |                        |                            |
| Patients with a history of visiting areas in the outbreak                                                       | 86.7                     | 92.9                   | -0.07 to 0.17              |
| All patients who require hospitalization                                                                        | 38.9                     | 31.0                   | -0.10 to 0.25              |
| All patients who need surgery                                                                                   | 25.6                     | 31.0                   | -0.10 to 0.22              |
| All patients who have recently been admitted to other hospitals                                                 | 30.0                     | 28.6                   | -0.16 to 0.17              |
| Medical staff treating COVID-19 patients                                                                        | 25.6                     | 42.9                   | 0 to 0.34                  |
| Screening for asymptomatic individuals is not required                                                          | 13.3                     | 9.5                    | -0.09 to 0.15              |
| <b>Measures that should be upheld even after the end of the current outbreak<sup>a</sup></b>                    |                          |                        |                            |
| Thorough hand hygiene                                                                                           | 74.4                     | 73.8                   | -0.15 to 0.17              |
| Avoiding public spaces if one shows symptoms of infections, such as fever                                       | 71.1                     | 69.0                   | -0.14 to 0.19              |
| Wearing masks in public                                                                                         | 55.6                     | 59.5                   | -0.14 to 0.21              |
| Informing hospitals of recent visits to at-risk areas or recent contact with COVID-19 patients                  | 38.9                     | 42.9                   | -0.14 to 0.22              |
| Observe cough etiquette                                                                                         | 35.6                     | 28.6                   | -0.11 to 0.23              |
| Maintaining a 2-meter distance                                                                                  | 24.4                     | 26.2                   | -0.13 to 0.18              |
| Use of personal items, such as towels, tableware, mobile phones, etc.                                           | 0                        | 0                      | -                          |

COVID-19, coronavirus disease 2019; CI, confidence interval; PAPR, powered air purifying respirator; RT-PCR, real-time reverse-transcriptase polymerase chain reaction.

<sup>a</sup>This question requested the responder to select the three most important items.

<sup>b</sup>This question requested the responder to select multiple items.
